# Supplementary material for: Synthesis and characterization of waterborne polyurethane containing poly(3-hydroxybutyrate) as new biodegradable elastomers
Source: Royal Society of Chemistry journal article supplement (doi:10.1039/c5tb01773d), 2015-01-01
Supplement: c5tb01773d1.pdf [file c5tb01773d1.pdf]

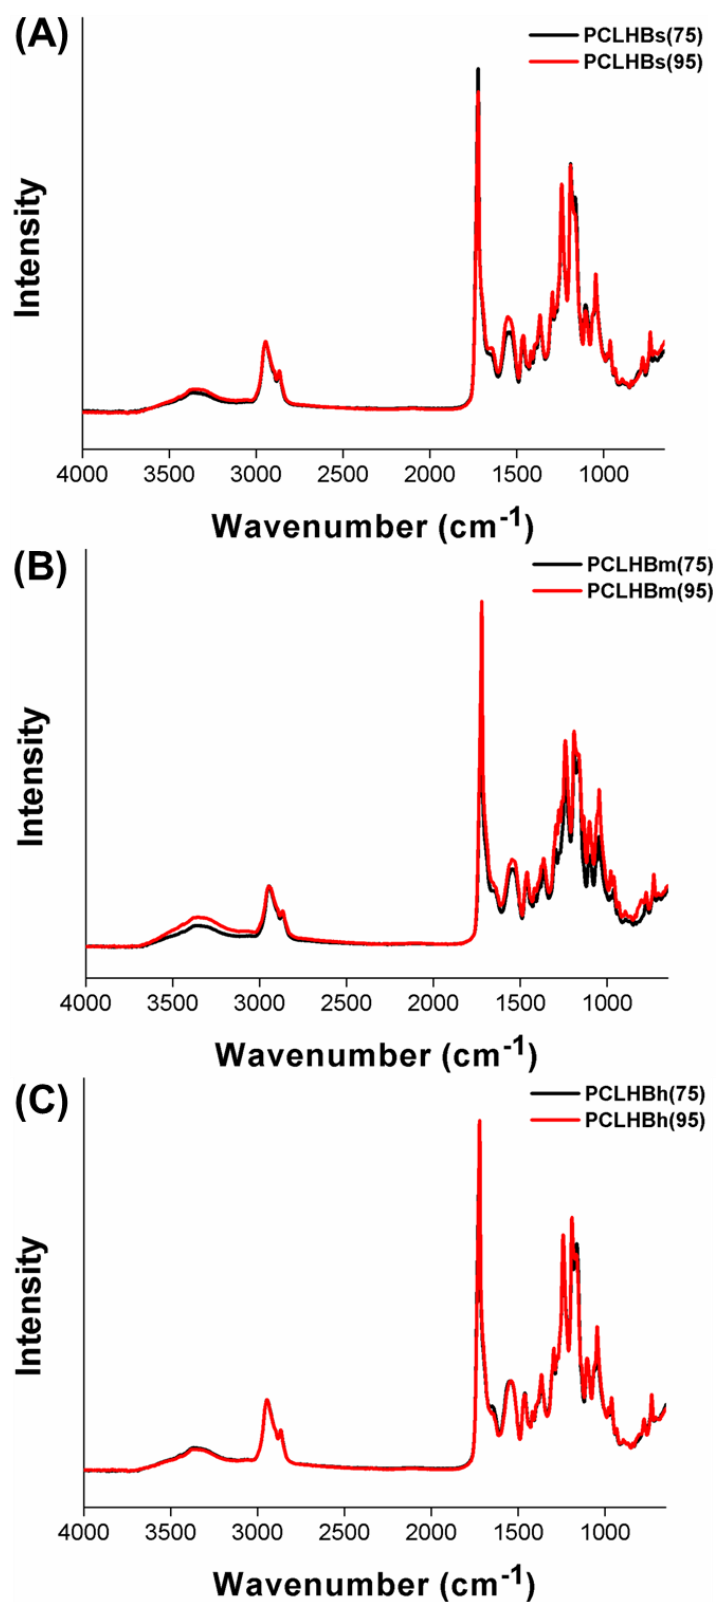

**Figure S1.** The ATR-IR analysis of different PU films: (A) PCLHBs, (B) PCLHBm, and (C) PCLHBh.

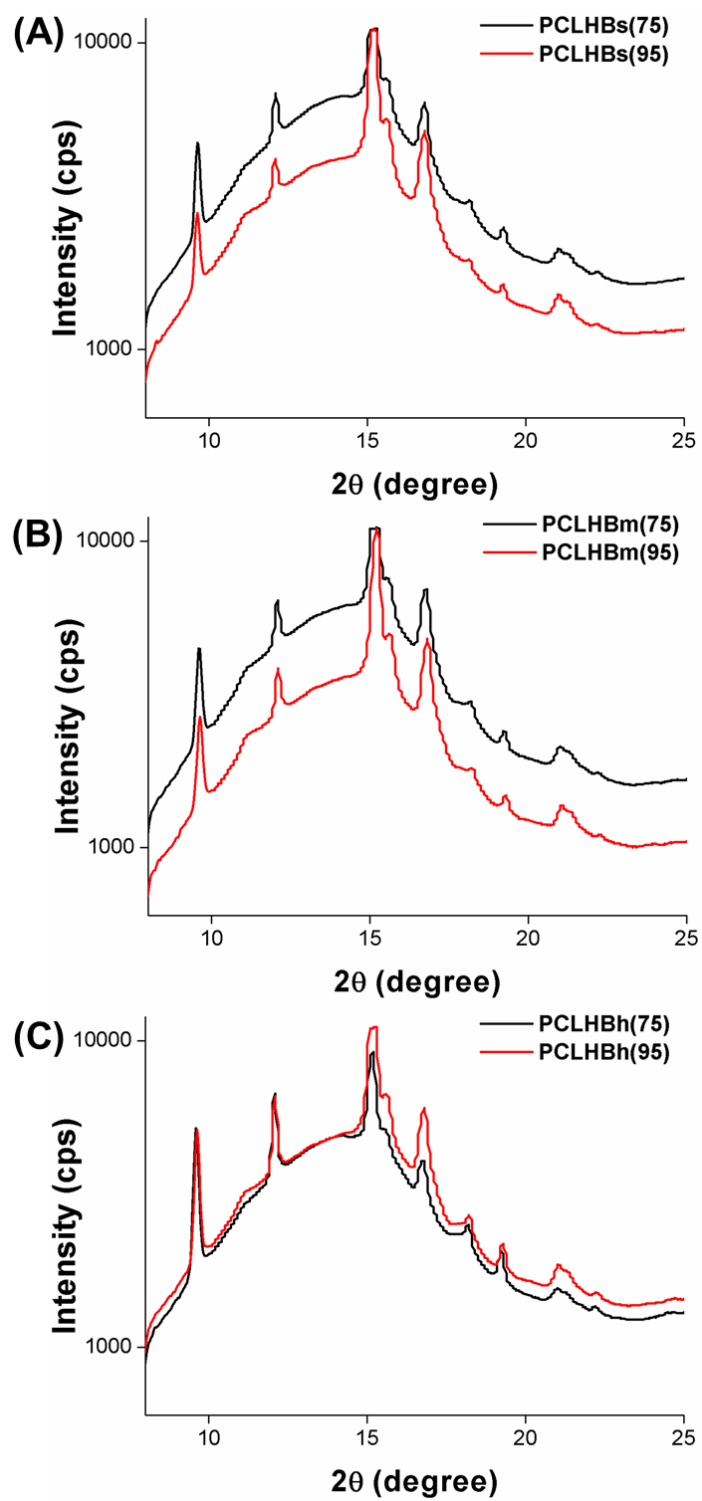

**Figure S2.** XRD profiles for different PU films: (A) PCLHBs, (B) PCLHBm, and (C) PCLHBh.

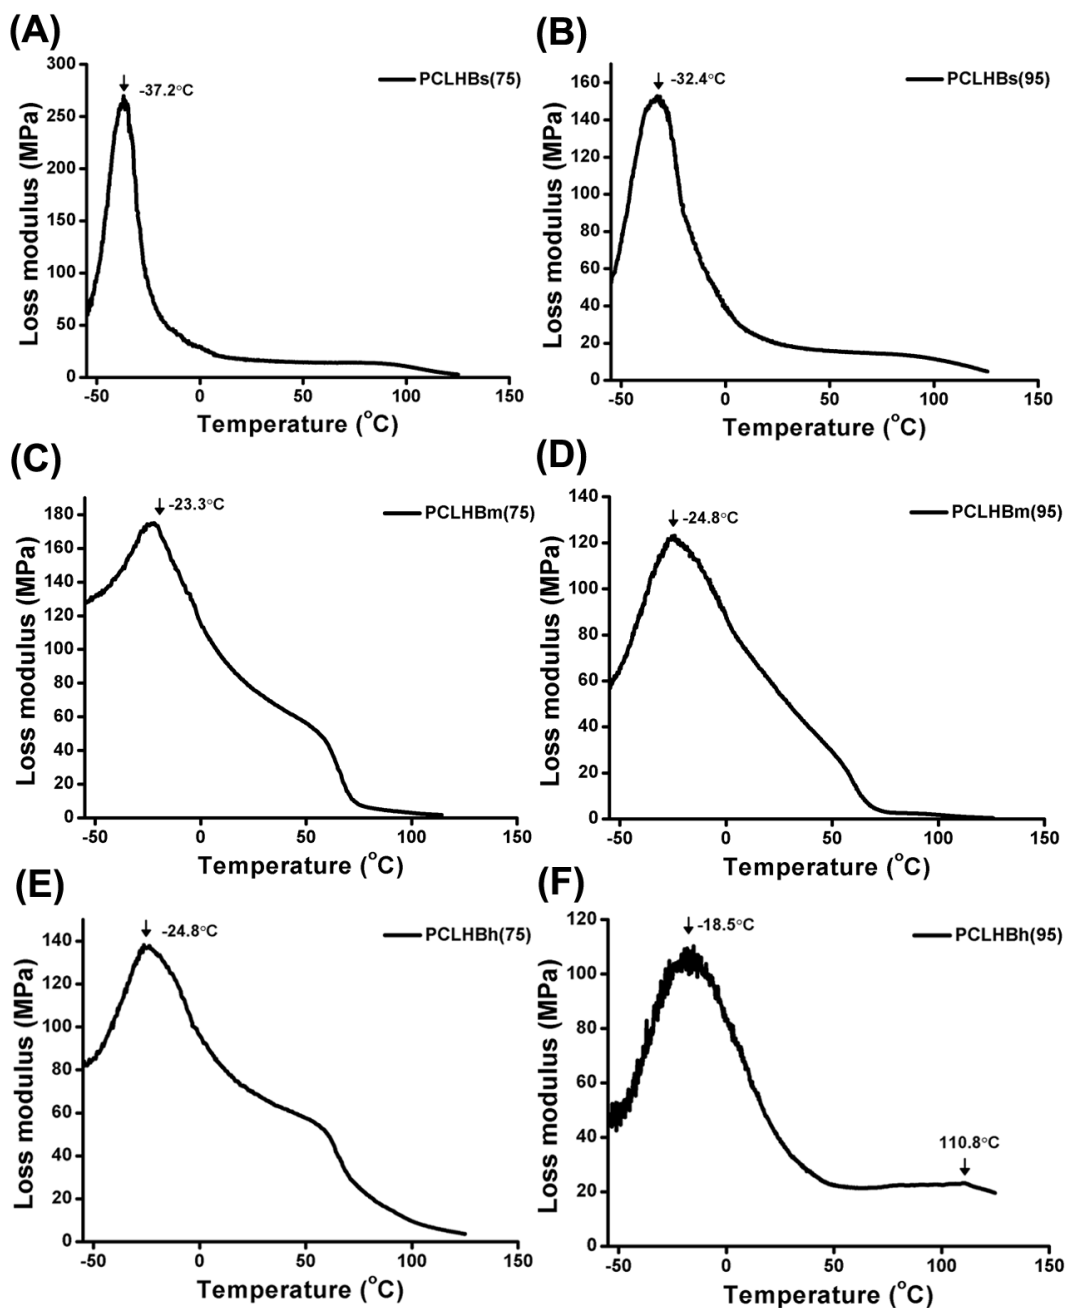

**Figure S3.** DMA profiles for different PU films: (A) PCLHBs(75), (B) PCLHBs(95), (C) PCLHBm(75), (D) PCLHBm(95), (E) PCLHBh(75), and (F) PCLHBh(95).

### Method

The loss modulus of PCL-PHB-based PUs was measured by a DMA (Q-800, TA Instruments) under 0.1% strain and 1 Hz of frequency in the range from -60°C to 125°C.
